# Supplementary material
Source: PubMed Central journal article supplement (PMC3003755)
Supplement: NIHMS247005-supplement-2.pdf [file NIHMS247005-supplement-2.pdf]

## Supplementary Figures and Table

### Supplementary text

Additional analysis of patients with wildtype or mutant *TET2*. Essentially all patients with *TET2* mutations exhibited low genomic levels of 5-hmC, irrespective of the stage of the disease (low risk versus advanced, gauged by percentage of blasts in the bone marrow or risk assessment by International Prognostic Scoring System); this most likely reflects the fact that in bone marrow of these disorders (MDS and in particular CMML), the majority of cells are derived from malignant clones.

Low 5-hmC levels were seen in a considerable fraction of patients with wild type *TET2* (**Figs. 2c, 4a, 4b**). It is unlikely that these patients have loss-of-function of TET1 or TET3: both *TET1* and *TET3* loci have been sequenced extensively in several laboratories, including ours, and no mutations or lesions identified by SNP-A karyotyping were found<sup>3,7</sup> (**Suppl. Table S1**, and data not shown). Moreover, the chromosomal region containing *TET1* (10q21) is only rarely subject to deletions or loss of heterozygosity in myeloid malignancies, unlike the 4q24 region that harbours *TET2*.

To test the possibility that the *TET2* alleles of some patients might harbor undiscovered mutations in *cis*-regulatory regions that diminish *TET2* mRNA expression, we performed quantitative RT-PCR on mRNA extracted from healthy controls and patients with mutant *TET2*, patients with wild type *TET2* but low 5-hmC, and patients with wild type *TET2* and high 5-hmC (n=6 for each group). This analysis did not reveal any systematic differences in *TET2* expression in the four groups (A.M.J., Y. H., J. P. M. and A. R., data not shown).

The most interesting possibility is that patients with wild type *TET2* but low 5-hmC bear mutations in other proteins involved in TET2-mediated catalysis. These could include partner proteins that associate with TET2, metabolic enzymes implicated in the biogenesis of TET2 co-factors, or regulatory proteins controlling the appropriate targeting of TET2 to relevant genomic regions / TET2 target genes.

A final possibility is that CpG hypomethylation is the primary event in a subset of tumours with wild type *TET2* but low 5-hmC. By diminishing the levels of the TET2 substrate, 5-mC, this might cause a secondary decrease in the levels of 5-hmC.

Expression pattern of Tet family members during haematopoietic development. During erythroid development, *Tet2* expression was progressively downregulated as LSK differentiated into megakaryocyte-erythroid progenitors (MEPs) and then into early erythroblasts (Ter-119<sup>+</sup>) (**Suppl. Fig. 9a, middle panel**). *Tet2* mRNA was also strongly expressed in common lymphoid progenitors (CLPs), gradually increased in early B cell precursors in the bone marrow, then declined slightly in mature B cells; in contrast, it was progressively downregulated during early T cell development in the thymus

but strongly induced at the double-positive (DP) and single-positive (SP) stage (**Suppl. Fig. 9a**). *Tet1* showed a different expression pattern: *Tet1* mRNA levels progressively declined during myeloid differentiation as well as during the later stages of B cell differentiation, but were high in DP and SP thymocytes, the terminal stages of T cell thymic differentiation (**Suppl. Fig. 9a, top panel**). Another member of the Tet family, *Tet3*, showed a progressive decline in mRNA expression during myeloid differentiation. *Tet3* mRNA was also expressed in CLPs and gradually increased during early B cell development, and then declined in mature B cells (**Suppl. Fig. 9a, bottom panel**).

In parallel, we analysed Tet mRNA expression in mouse embryonic stem (ES) cells. Undifferentiated ES cells expressed high levels of *Tet1* mRNA, moderate levels of *Tet2* mRNA, and no *Tet3* mRNA. After exposure for 4 days to 1  $\mu$ M retinoic acid (RA), *Tet1* and *Tet2* mRNA levels declined to very low levels whereas *Tet3* mRNA levels increased by several-fold.

We also assessed 5-hmC levels by anti-CMS dot blot after bisulfite treatment of DNA. 5-hmC levels were high in LSK progenitors, mature Gr-1<sup>+</sup>Mac-1<sup>+</sup> granulocytes and Gr-1<sup>-</sup>Mac-1<sup>+</sup> monocyte populations, but low in Ter-119<sup>+</sup> erythroid cells (**Suppl. Fig. 9b**). In B cell lineages, the 5-hmC level was high in pro-B cells but decreased in pre-B cells, followed by gradual increase at subsequent development stages (immature and mature B cells; **Suppl. Fig. 9b**). In the thymus, 5-hmC level was high in single-positive (SP) CD4<sup>+</sup> and CD8<sup>+</sup> thymocytes, but relatively lower at immature single positive (ISP) and double-positive (DP) stages (**Suppl. Fig. 9c**).

**Suppl. Table 1.** Summary of clinical features and *TET2* mutational status in patients and healthy control individuals who provided genomic DNA for measurement of 5-hmC levels in **Fig. 2** and **Suppl. Fig. 7**. Samples from *Expt. 1* were analysed in **Fig. 2a-c**, samples from *Expts. 2-4* in **Suppl. Fig. 7**, and samples from *Expt. 5* in **Fig. 2d**.

**Suppl. Table 2.** Sites of differential methylation in comparisons of bone marrow/ peripheral blood samples from patients with low 5-hmC versus healthy controls.

**Suppl. Figure. 1.** Protein sequence of the mouse *Tet2* C-terminal region encompassing its catalytic domain, compared with the protein sequences predicted from Ensembl ([ENSMUSG00000040943](https://ensembl.org/Homo_sapiens/Transcript/View?g=ENSMUSG00000040943)) and GenBank (NM\_001040400). The cysteine-rich (Cys-rich) region (amino acids 1,042-1,241 in our sequence) and double stranded beta-helix region (amino acids 1,242-1,919 in our sequence) are indicated. The region differing from that in the public databases is enclosed in a red rectangle. The amino acids targeted for mutagenesis are indicated. The entire nucleotide sequence of the *Tet2* ORF cloned from cDNA of V6.5 mouse ES cells is available upon request.

**Suppl. Figure 2.** Protein sequence alignment of mouse *Tet2* with human TET2. Leukemia-

associated amino acid substitutions in the human TET2 sequence, and the corresponding amino acids targeted for mutagenesis in the mouse Tet2 sequence, are indicated.

**Suppl. Figure 3.** The enzymatic activity of Tet2 is impaired by leukemia-associated mutations.

**a**, Schematic representation of additional missense mutations in *TET2*. Five leukemia-associated mutations discovered in patients and the corresponding substitutions introduced into murine *Tet2* are indicated.

**b**, Immunocytochemical detection of Myc-Tet2 (red) and 5-hmC (green) in HEK293T cells transiently transfected with wild type and mutant Tet2. Staining was performed as in **Fig. 1b**.

**c**, Detection of Myc-Tet2 (green) and 5-mC (red) in HEK293T cells (staining performed as in **Fig. 1c**).

**d**, Western blot analysis of purified (CD25<sup>+</sup>) HEK293T cells expressing wild type and mutant Myc-Tet2. Tet2 was expressed and detected as described in **Fig. 1d**.

**e**, Dot-blot analysis of 5-hmC levels in HEK293T cells over-expressing wild type or mutant Tet2. CMS levels in bisulfite-treated DNA were quantified as described in **Fig. 1e**. As positive and negative controls, we included DNA from CD25<sup>+</sup> HEK293T cells transfected with TET1 catalytic domain (TET1-CD) or TET1-CD with mutations in the HxD motif (TET1-CD-HxDmut)<sup>1</sup>.

**Suppl. Figure 4.** Quantification of fluorescence intensity in transfected cells. The fluorescence signal intensity of 5-hmC and 5-mC in HEK293T cells transfected with wild type or mutant *Tet2* in **Figs. 1b, c** (a, b) and **Suppl. Figs. 3b, 3c** (c, d) was measured using Photoshop CS4 software and plotted using GraphPad Prism 5. The horizontal bar indicates the mean for each group.

**Suppl. Figure 5.** Specificity and density dependence of polyclonal antibodies against 5-hmC or its adduct after bisulfite treatment, cytosine 5-methylsulfonate (CMS).

**a**, Sodium bisulfite converts 5-hmC into cytosine-5-methylenesulfonate (CMS)<sup>14,15</sup>.

**b**, Specificity of the anti-5-hmC and anti-CMS antisera. Rabbits were immunized with 5-hmC or CMS conjugated to KLH. Antisera collected from these immunized rabbits were tested in the dot-blot assay for their ability to selectively detect distinct cytosine modifications on serially-diluted (0.05 pmol to 3 pmol) lambda ( $\lambda$ ) phage DNA, lambda ( $\lambda$ ) phage DNA methylated *in vitro* at CpG sites with SssI ( $\lambda$ <sup>Me</sup>), or DNA from 5-hmC-containing T4\* bacteriophage (produced by growth on the appropriate *E. coli* host<sup>1</sup>) before (T4\*) and after bisulfite treatment (T4\*-BiS). Both antisera were highly specific for the respective cytosine modifications.

**c**, Density dependence of anti-5-hmC and anti-CMS antisera. Oligos with different densities of 5-hmC were produced by PCR-amplifying a 201 bp double-stranded oligo containing a total of 81 cytosines using dCTP, 5hmdCTP, or mixtures of dCTP with 20%, 5%, and 1.25% 5hmdCTP. Two-fold dilutions

of the amplified DNA were assayed by dot blot as in **b**. The data are plotted as dot blot intensity normalized to the total amount of 5-hmC in the spot (i.e. 1 pmol of an oligo in which all 81 cytosines are replaced with 5-hmC contains 81 pmol 5-hmC, equivalent to 5 pmol of an oligo generated with a 20:80 mixture of 5-hmC:C, that contains ~16 5-hmC on average). *Top*, When the anti-5-hmC antiserum is used to detect 5-hmC directly, a 5-fold drop in 5-hmC density results in a >30-fold drop in detection efficiency. *Bottom*, If instead the oligos are treated with sodium bisulfite before performing the dot blot, an 80-fold change in the density of 5-hmC (CMS) produces only an ~10-fold drop in detection efficiency with the anti-CMS antiserum, and this is partly due to the fact that when PCR amplification is performed at low 5-hmC:C ratios, many of the resulting PCR fragments lack 5-hmC entirely. Thus unlike the anti-5-hmC antiserum which reacts efficiently only with oligos containing high densities of 5-hmC, the anti-CMS antiserum efficiently recognizes oligos with even a single 5-hmC.

**Suppl. Figure 6.** Analysis of 5-hmC and 5-mC levels in HEK293T cells expressing wild type or mutant Tet2.

**a-b**, Genomic DNA was extracted from purified CD25<sup>+</sup> HEK293T cells over-expressing wild type or mutant Tet2 (see **Fig. 1**) and blotted onto nitrocellulose membrane after two-fold serial dilution. 5-hmC was detected with antisera against 5-hmC (**a**, see **Suppl. Fig. 5b**, *left panel*) or 5-mC (**b**, Calbiochem, NA#81).

**c-d**, Dot-blot analysis to quantify levels of 5-hmC in CD25<sup>+</sup> HEK293T cells over-expressing wild type or mutant Tet2 (see **Suppl. Fig 3**) using the anti-5-hmC (**c**) or anti-5-mC (**d**) antibody as described above.

**Suppl. Figure 7.** 5-hmC (CMS) levels in genomic DNA samples from healthy donors and patients with different haematological malignancies. 5-hmC levels were assessed by dot blot assay of bisulfite-treated DNAs, serially diluted and probed with the anti-CMS antiserum.

**a**, Relative 5-hmC (CMS) levels from experiments (Expts.) 2-4 are shown, normalised to the average 5-hmC level in patients with wild type *TET2* (set at 1) (for patient data, see **Suppl. Table 1**). The horizontal bars indicate the mean.

**b**, 5-hmC (CMS) levels in genomic DNA from healthy donors and patients with haematological malignancies. Data were plotted as median  $\pm$  S.D. ( $n=3$ ). Black bars: healthy donors, blue bars: MDS, orange bars: MPN, red bars: MDS/MPN, purple bars: AML, green bars: sAML derived from the above conditions.

**Suppl. Figure 8.** A representative scheme for haematopoietic cell sorting. Total enucleated bone marrow cells (**a-d**) or thymocytes (**e**) were stained with antibodies as described and haematopoietic subsets were sorted using the following criteria.

**a**, LSK (Lin<sup>-</sup>Sca-1<sup>+</sup>c-Kit<sup>+</sup>IL-7R $\alpha$ <sup>-</sup>) and CLP (Lin<sup>-</sup>IL-7R $\alpha$ <sup>+</sup>c-Kit<sup>lo</sup>Sca-1<sup>lo</sup>).

**b**, CMP (Lin<sup>-</sup>Sca-1<sup>-</sup>c-Kit<sup>hi</sup>CD34<sup>+</sup>FcγRII/III<sup>lo</sup>), GMP (Lin<sup>-</sup>Sca-1<sup>-</sup>c-Kit<sup>hi</sup>CD34<sup>+</sup>FcγRII/III<sup>hi</sup>) and MEP (Lin<sup>-</sup>Sca-1<sup>-</sup>c-Kit<sup>hi</sup>CD34<sup>-</sup>FcγRII/III<sup>lo</sup>).

**c**, granulocytes (Gr-1<sup>+</sup>Mac-1<sup>+</sup>), monocytes (Gr-1<sup>-</sup>Mac-1<sup>+</sup>) and early erythroblasts (Ter-119<sup>+</sup>).

**d**, pro-B (B220<sup>+</sup>IgM<sup>-</sup>CD43<sup>+</sup>), pre-B (B220<sup>+</sup>IgM<sup>-</sup>CD43<sup>-</sup>), immature (B220<sup>+</sup>IgM<sup>+</sup>) and mature (B220<sup>hi</sup>IgM<sup>+</sup>) B cells.

**e**, DN1 (CD4<sup>-</sup>CD8<sup>-</sup>CD44<sup>+</sup>CD25<sup>-</sup>), DN2 (CD4<sup>-</sup>CD8<sup>-</sup>CD44<sup>+</sup>CD25<sup>+</sup>), DN3 (CD4<sup>-</sup>CD8<sup>-</sup>CD44<sup>-</sup>CD25<sup>+</sup>), DN4 (CD4<sup>-</sup>CD8<sup>-</sup>CD44<sup>-</sup>CD25<sup>-</sup>), ISP (CD4<sup>-</sup>CD8<sup>+</sup>TCRβ<sup>-/lo</sup>), CD4<sup>+</sup> SP (CD4<sup>+</sup>CD8<sup>-</sup>TCRβ<sup>+</sup>) and CD8<sup>+</sup> SP (CD4<sup>-</sup>CD8<sup>+</sup>TCRβ<sup>+</sup>).

**Suppl. Figure 9.** Expression of Tet family members and 5-hmC levels in haematopoietic subsets.

**a**, *Tet1*, *Tet2* and *Tet3* mRNA expression during haematopoiesis. Cells along the myeloid and lymphoid (B and T cell) differentiation pathways were isolated from bone marrow and thymus of C57BL/6 mice by flow cytometry (**Suppl. Fig. 8**), and quantitative RT-PCR analysis was performed to assess the level of *Tet1*, *Tet2* and *Tet3* mRNA (shown after normalisation to the level of *Gapdh* mRNA in the same cell population). Total RNA from undifferentiated ES cells and ES cells treated with 1 μM retinoic acid for 4 days was also analyzed for comparison. The relative normalized levels of *Tet1-3* mRNA are shown, with the amount in the LSK population arbitrarily set to 1.

**b-c**, 5-hmC levels in bone marrow (**b**) and thymus (**c**) cell populations were assessed by quantitative dot blot assay with anti-CMS antibody after treatment of genomic DNA with bisulfite.

**Suppl. Figure 10.** *In vitro* differentiation in the presence of low cytokine concentrations in control and Tet2-depleted cells.

**a**, Schematic representation of retroviral constructs for RNAi-mediated knockdown of Tet2. Shown are control (LMP) and Tet2-KD retroviral vectors, encoding either GFP alone, or both GFP and shRNA against *Tet2* mRNA, respectively. The scramble retroviral vector (not shown) contains unrelated sequences instead of sh*Tet2* sequences.

**b**, Use of *Tet2* shRNA #3 to suppress *Tet2* gene expression in bone marrow cells. When the four SMARTpool (Dharmacon) siRNAs were tested individually in V6.5 ES cells, siRNAs #1 and #3 gave equivalent efficiency of knockdown. However, shRNA #3 gave better knockdown than shRNA #1 when cloned into the vector **pSUPER-puro** in V6.5 ES cells (K.P.K. and A.R. unpublished data). We therefore tested siRNAs #1 and #3 in the **LMP** retroviral vector by transducing c-Kit<sup>+</sup> bone marrow cells (Left) and NIH3T3 cells (Right). Only one of the two shRNA sequences (#3) was effective in bone marrow cells and NIH3T3 cells. Error bars show the range of duplicates.

**c**, c-Kit<sup>+</sup> bone marrow stem/progenitor cells were magnetically sorted from bone marrow of C57BL/6 mice and transduced as described. After selection with puromycin (2 μg/ml) for 3 days, GFP expression was analyzed by flow cytometry. Cells were subject to quantitative RT-PCR (see **Fig. 3a**).

**d**, Lin<sup>-</sup> cells were transduced with control (scramble) or sh*Tet2* retroviruses as shown in **Fig. 3c**, then

cultured in the presence of 50 ng/ml stem cell factor (SCF), puromycin (2 µg/ml) and cytokines at 1 ng/ml as indicated. After 4 days, flow cytometric analysis of Mac-1 vs. F4/80 (*left panel*) or CD115 (also known as M-CSFR) (*right panel*) was performed. All cells were GFP<sup>+</sup> at the day of analysis.

**Suppl. Figure 11.** Tet2 deficiency does not affect the acute proliferation of developing myeloid cells.

a, Lin<sup>-</sup> cells were transduced with control (scramble) or shTet2 retroviruses and then cultured in the presence of 50 ng/ml SCF, puromycin (2 µg/ml) and 10 ng/ml GM-CSF. After 4 days, cells were pulse-labeled with 10 µM BrdU (BD Biosciences) for 1 hr and stained to determine cell surface CD115 (M-CSFR) expression and BrdU incorporation.

b, BrdU incorporation was assessed after gating on CD115<sup>+</sup> (M-CSFR<sup>+</sup>) monocyte/macrophage cells.
