# Supplementary material
Source: PubMed Central journal article supplement (PMC3003755)

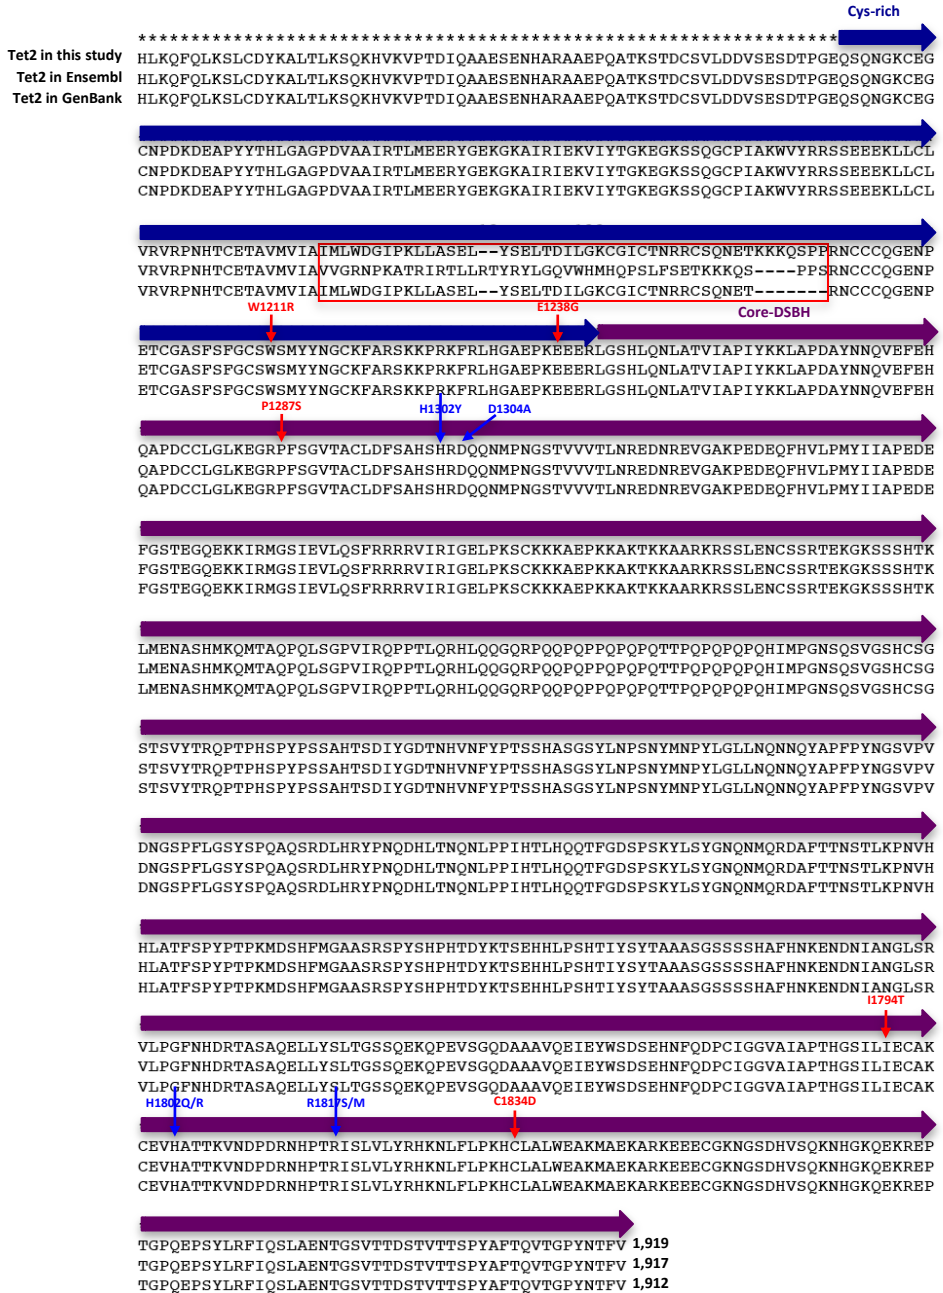

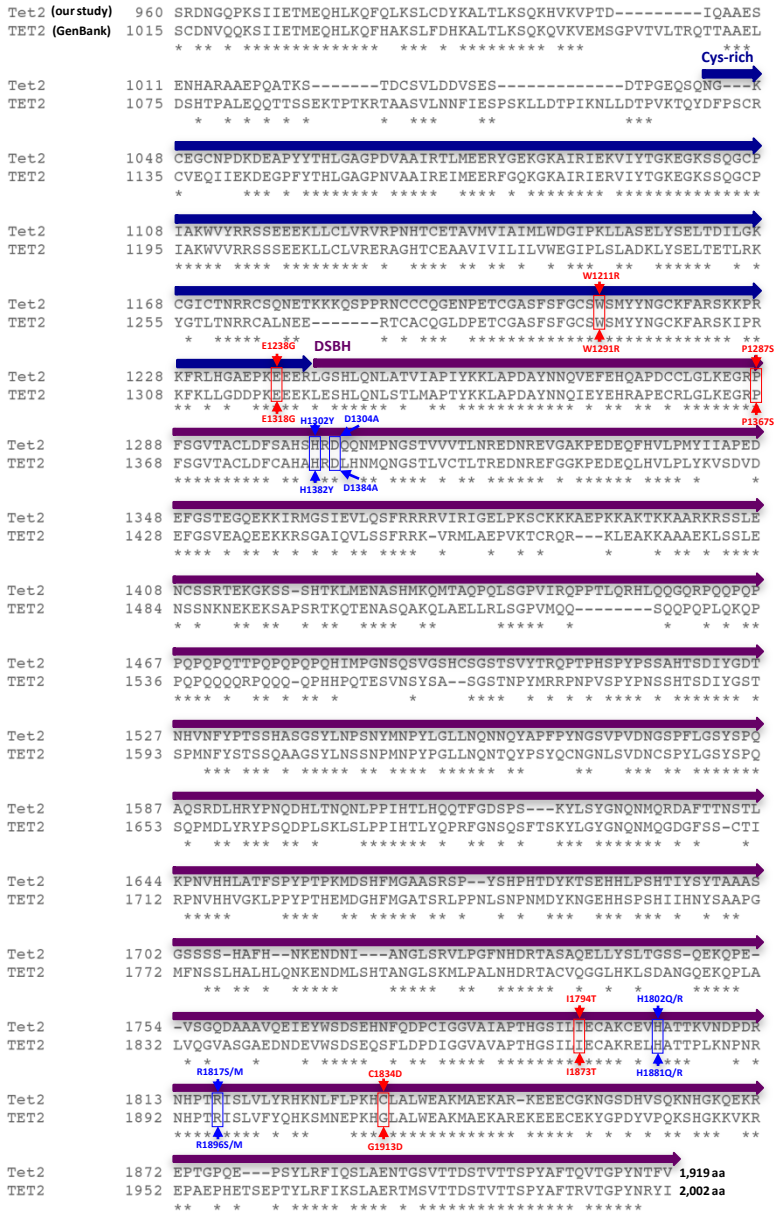

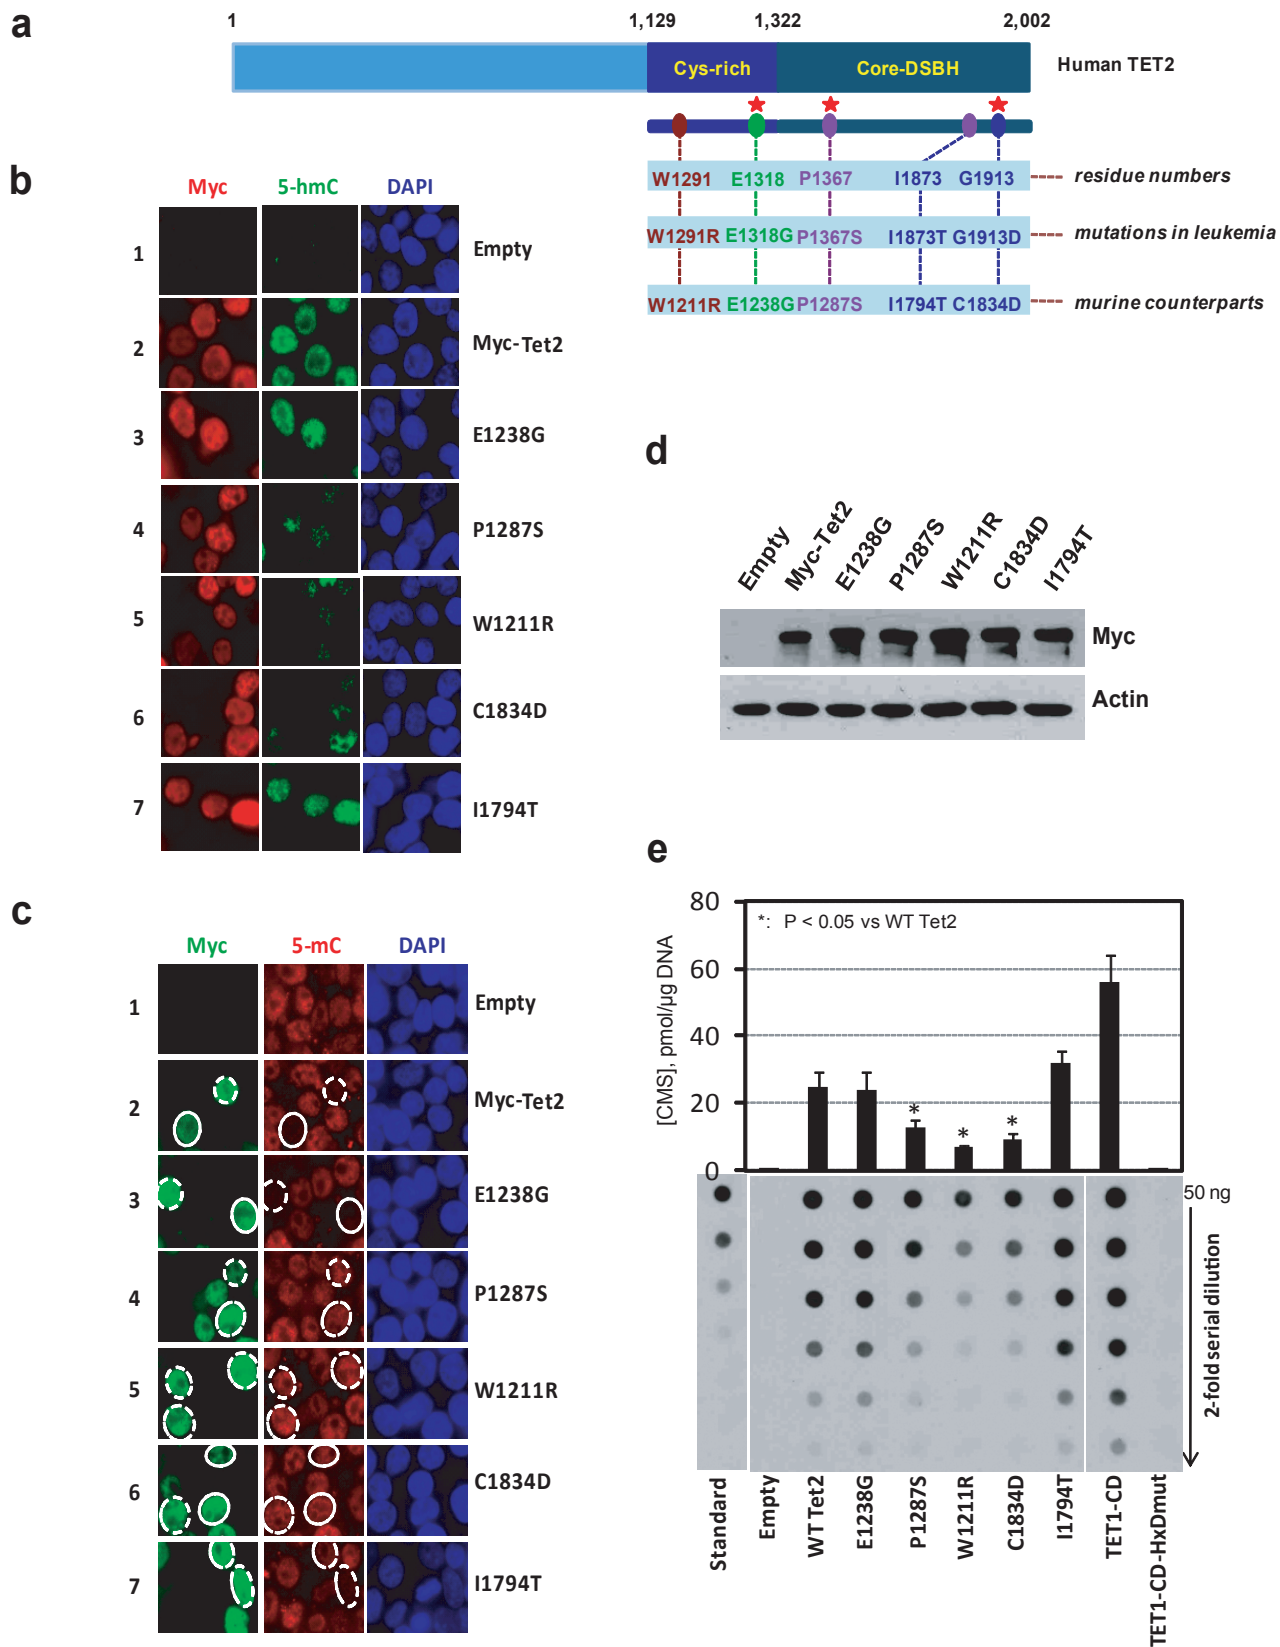

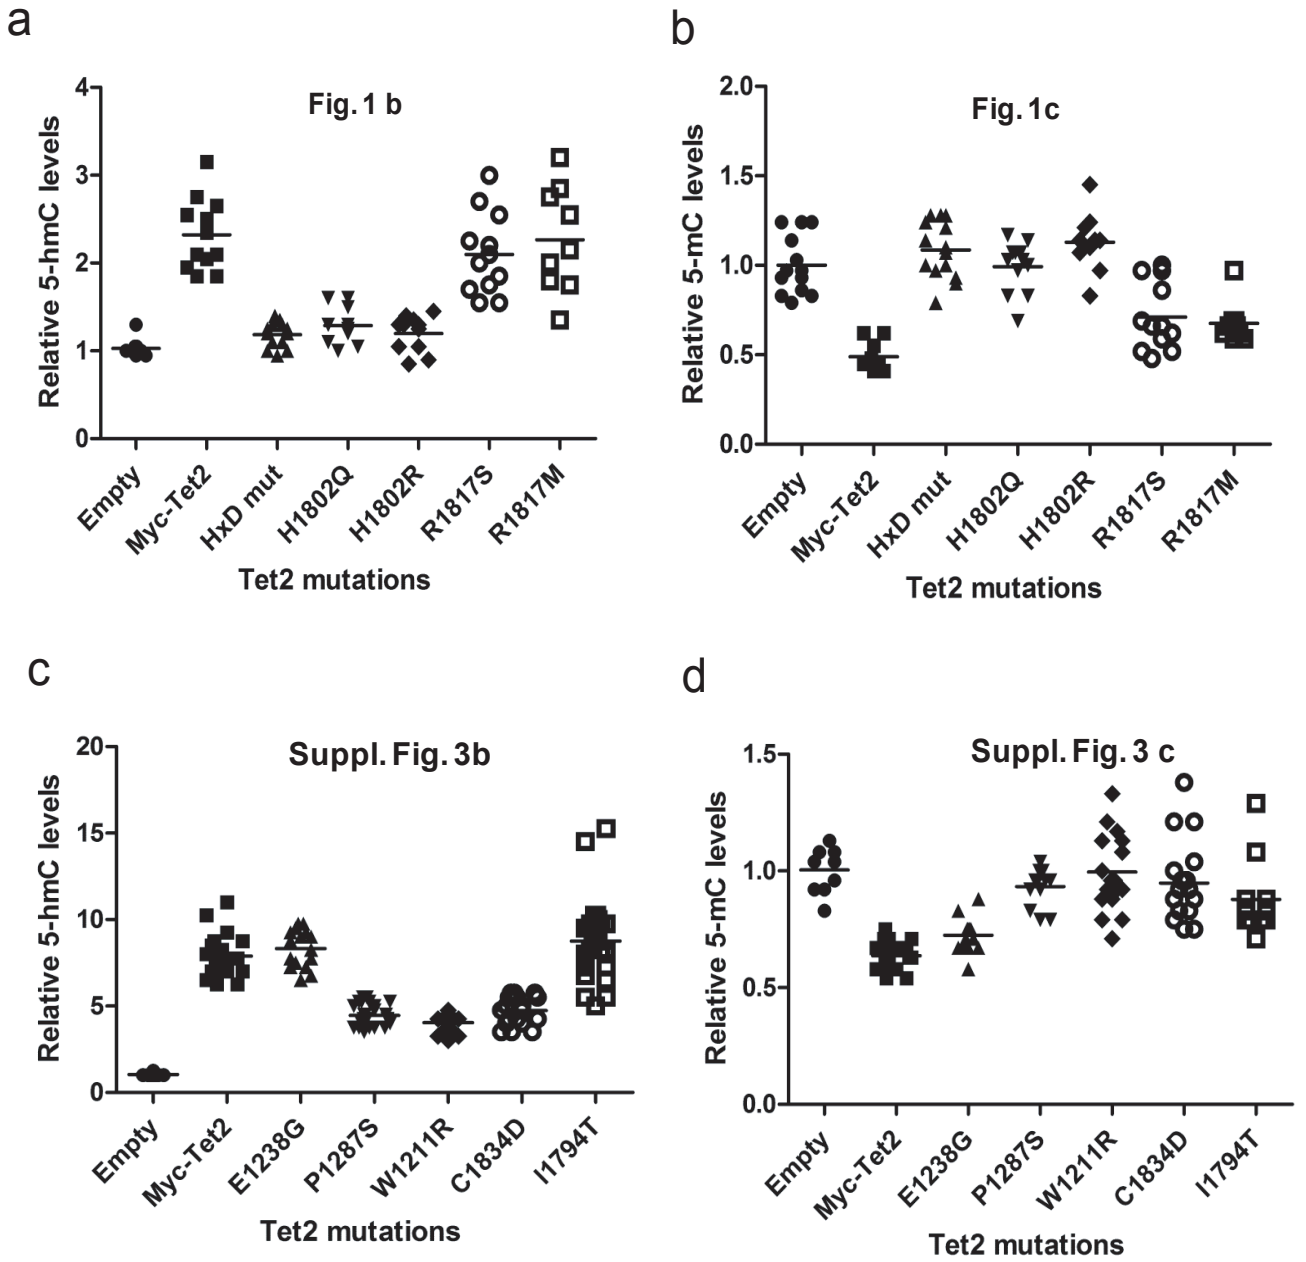

a

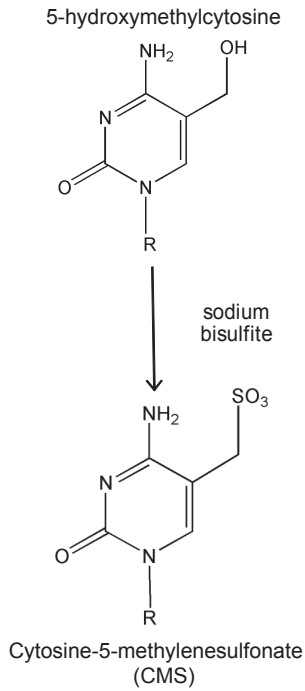

b

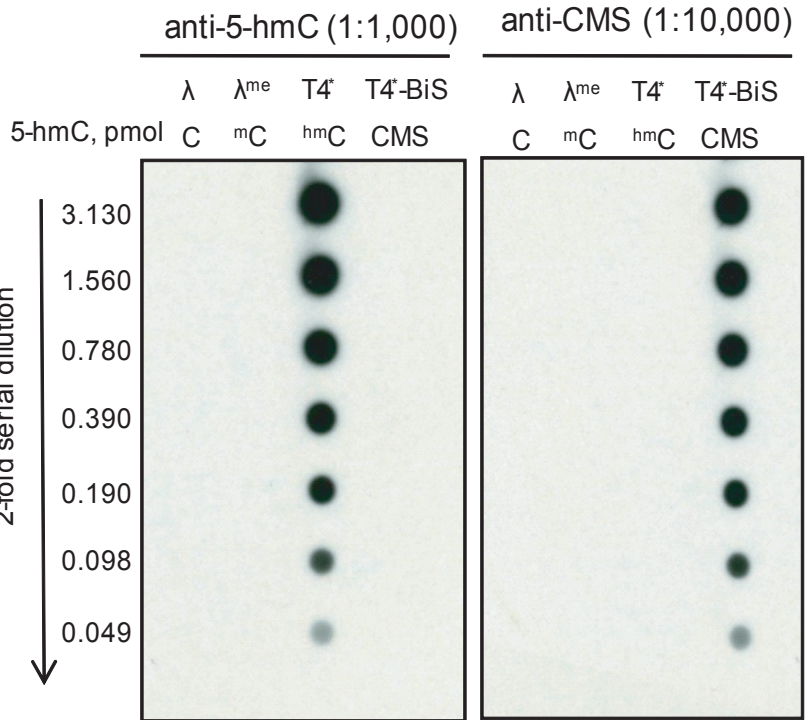

c

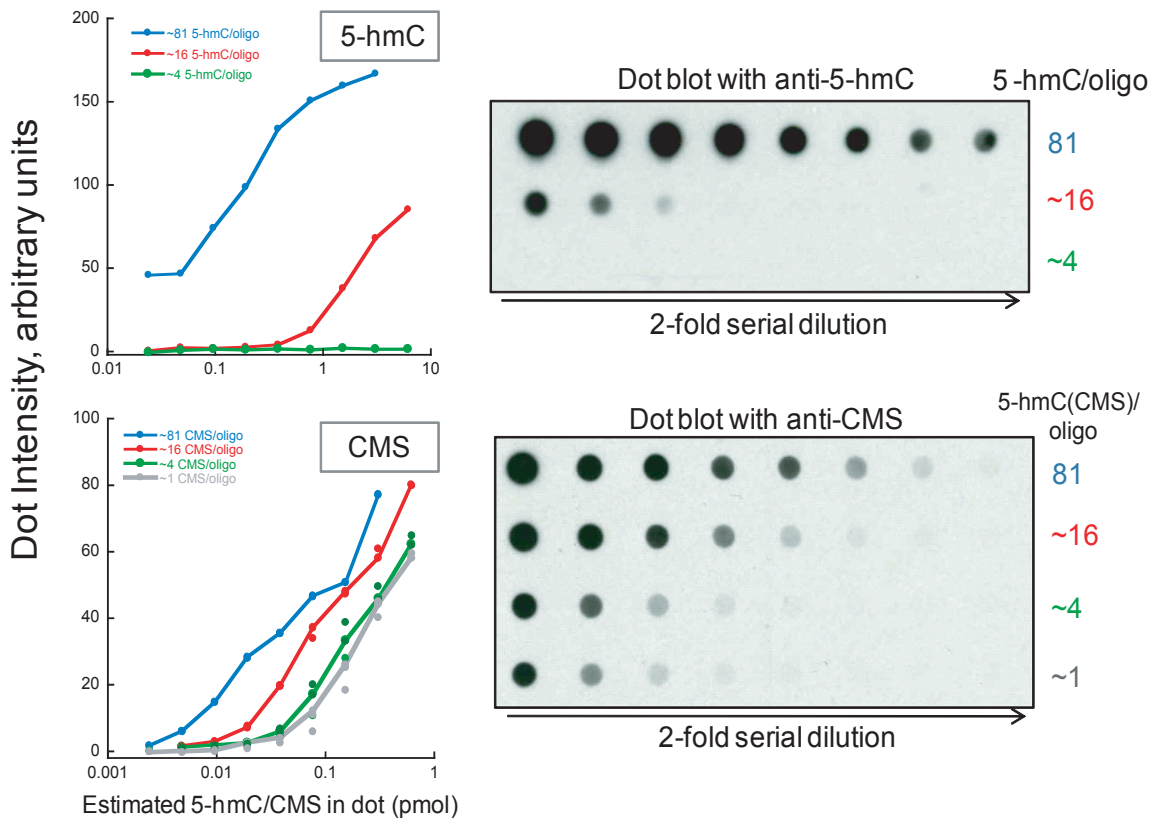

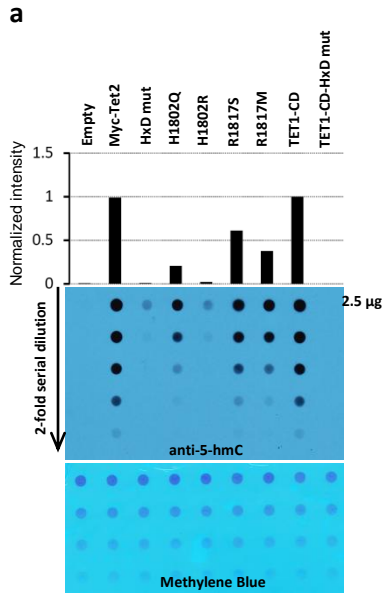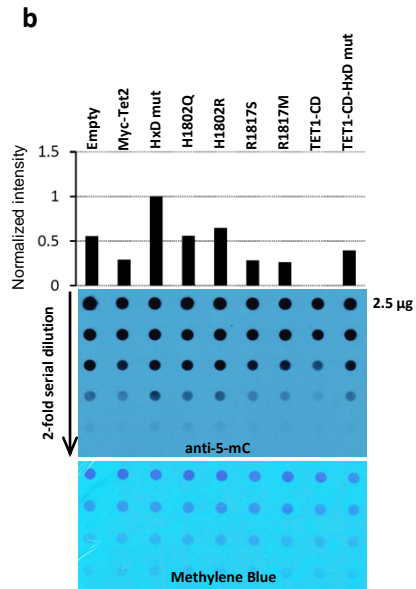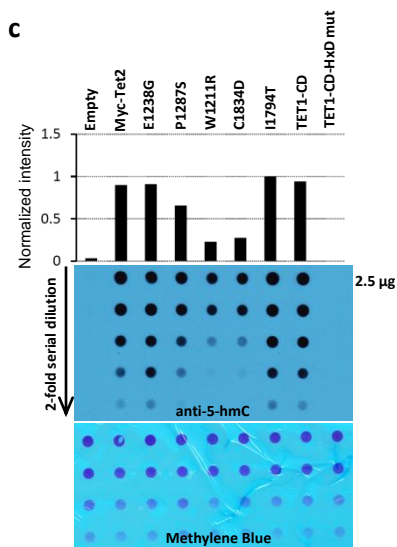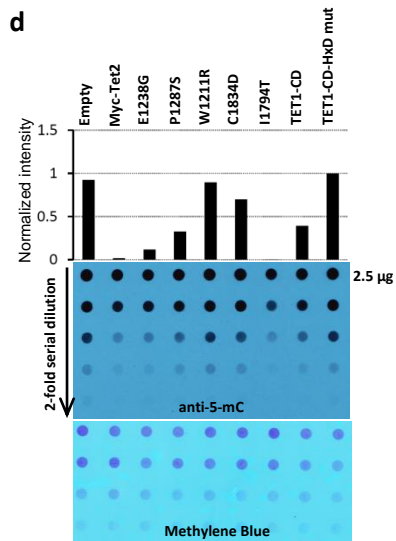



a

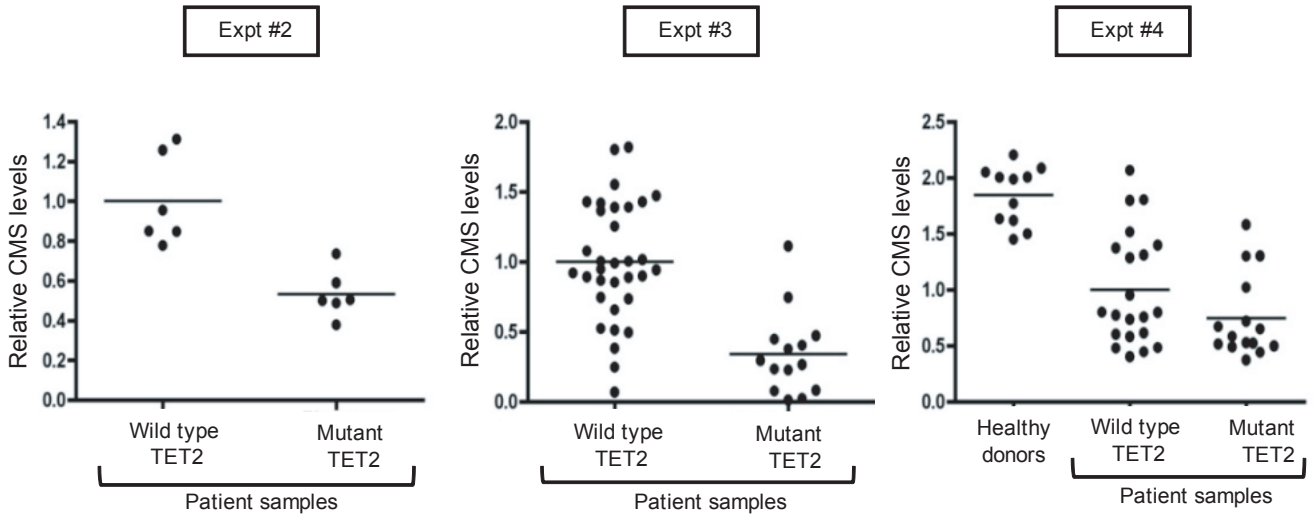

b

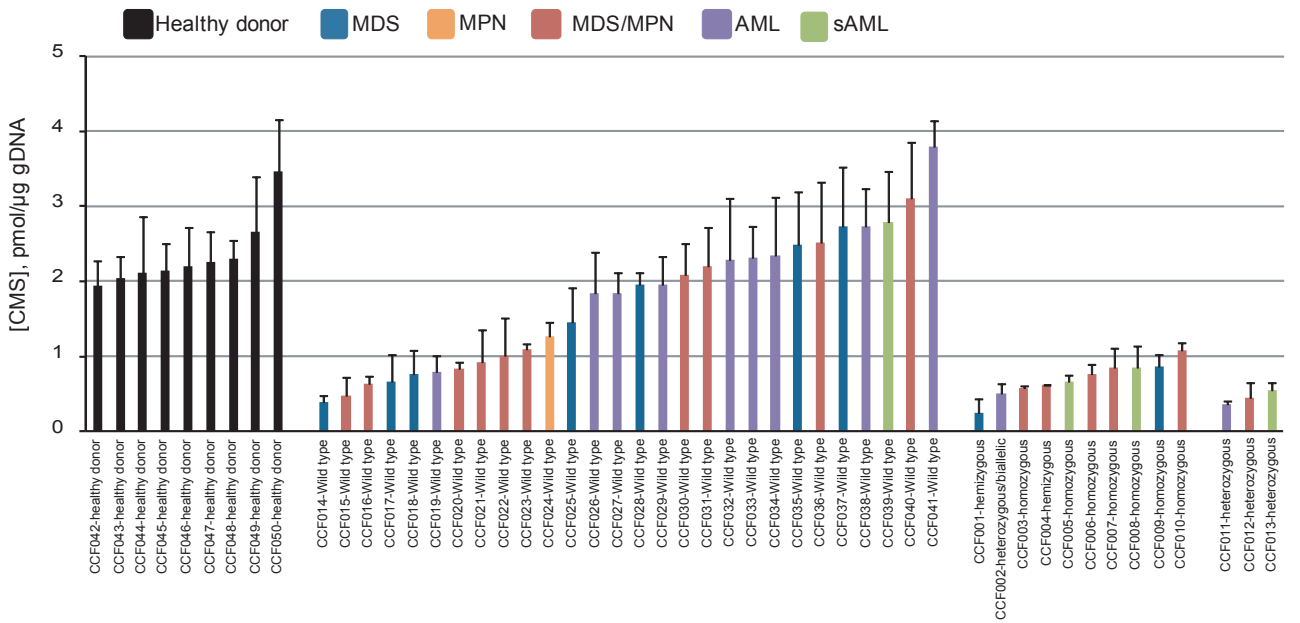

**a**

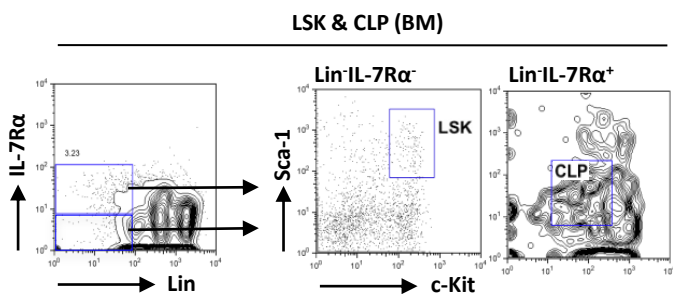

**b**

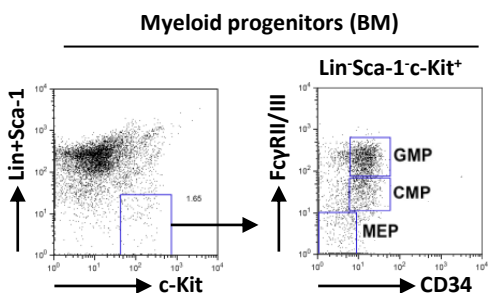

**c**

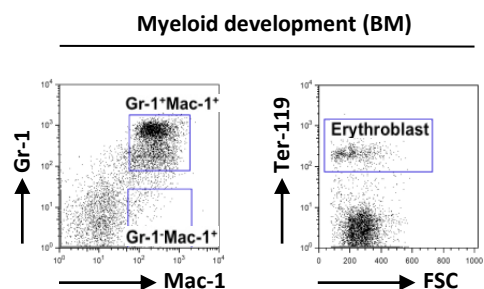

**d**

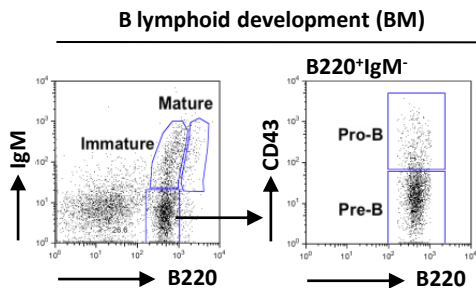

**e**

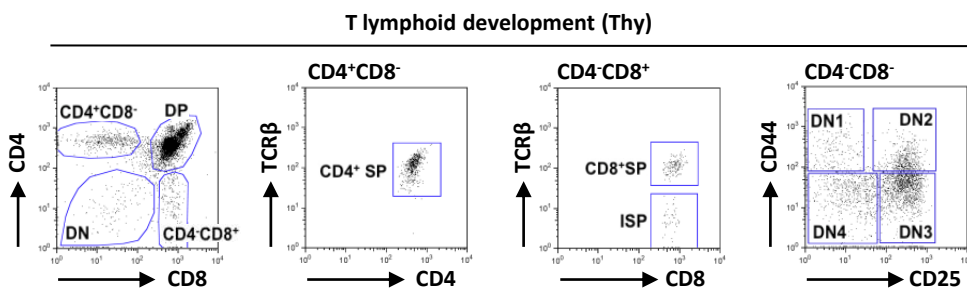



**a**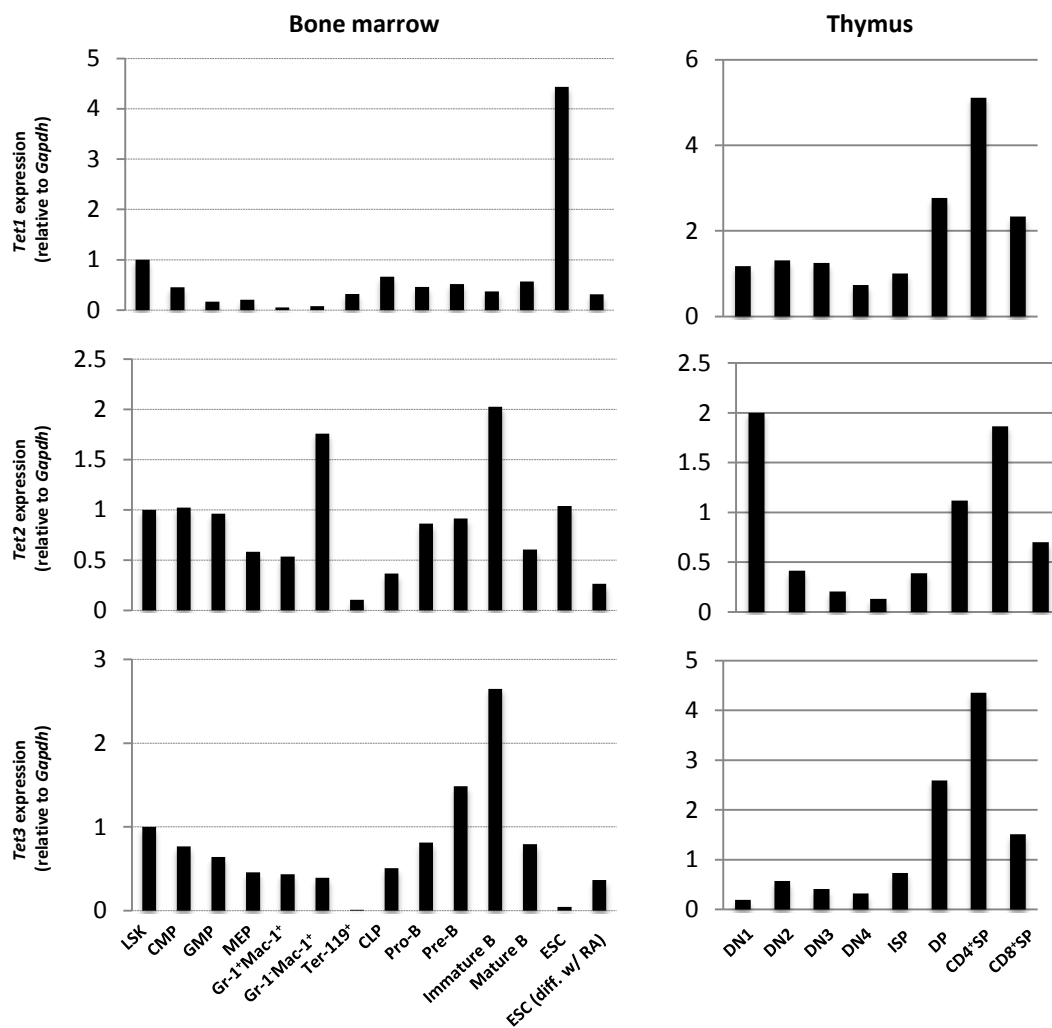**b**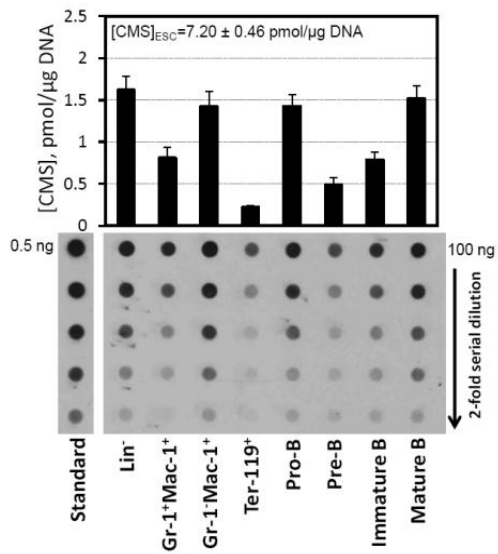**c**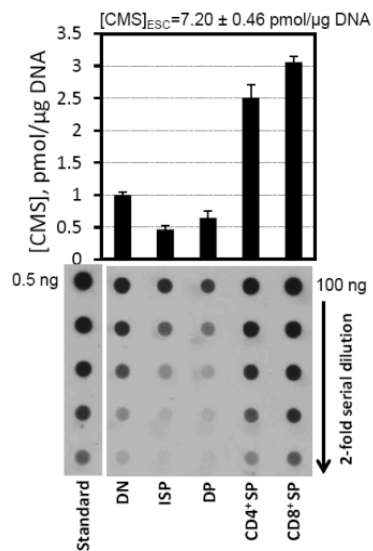

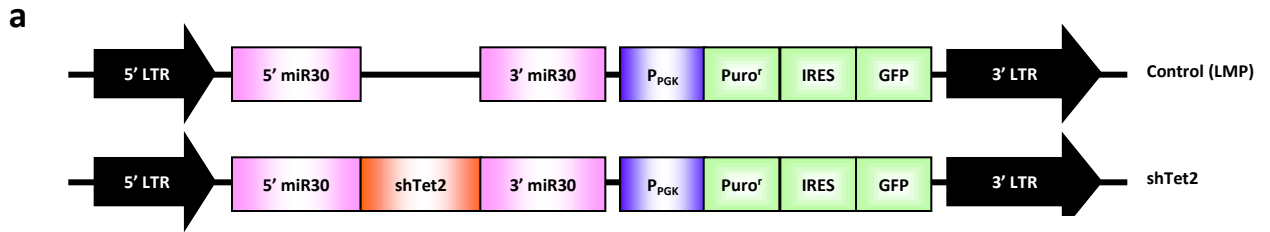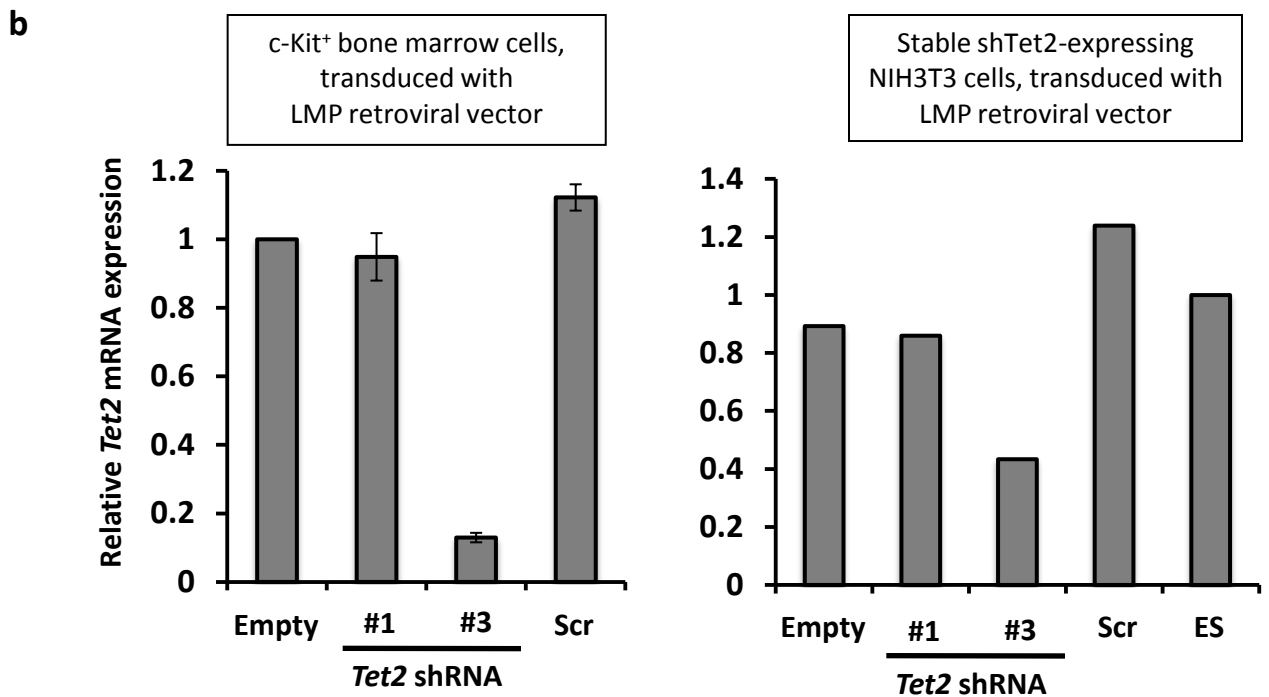

**C** Purification of c-Kit<sup>+</sup> BMCs, transduction & Puro selection

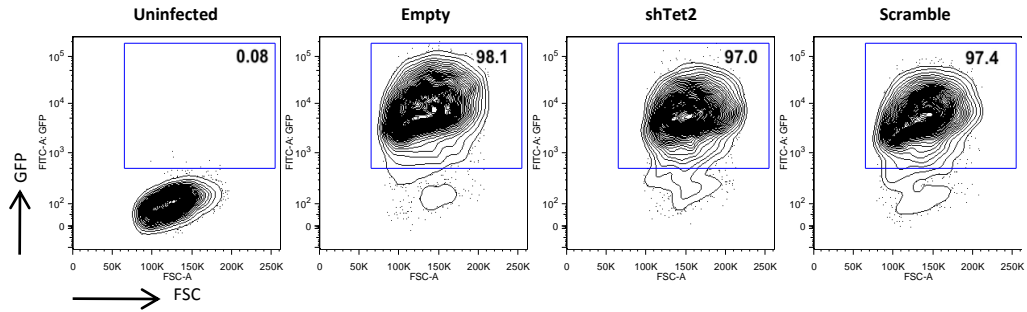

**d**

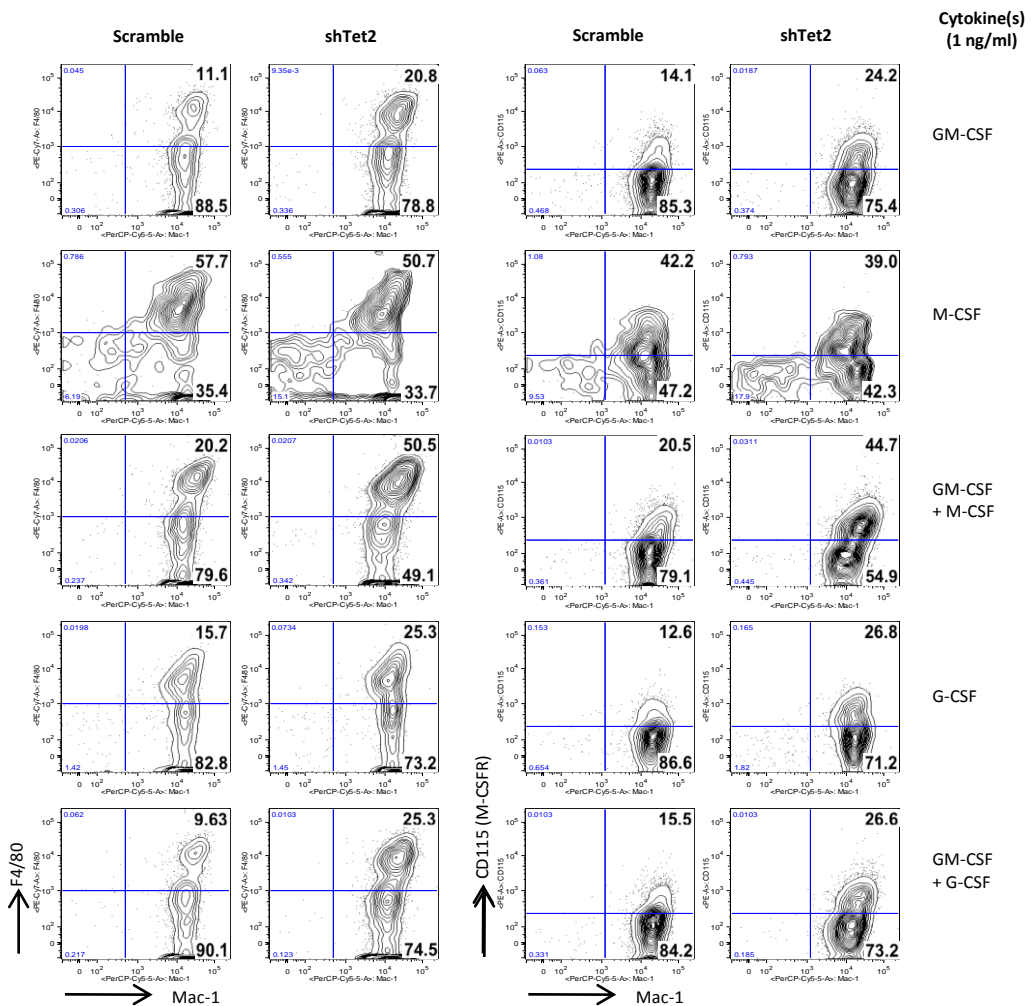

**a**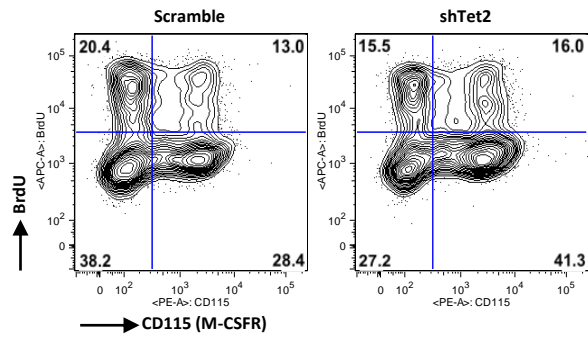**b**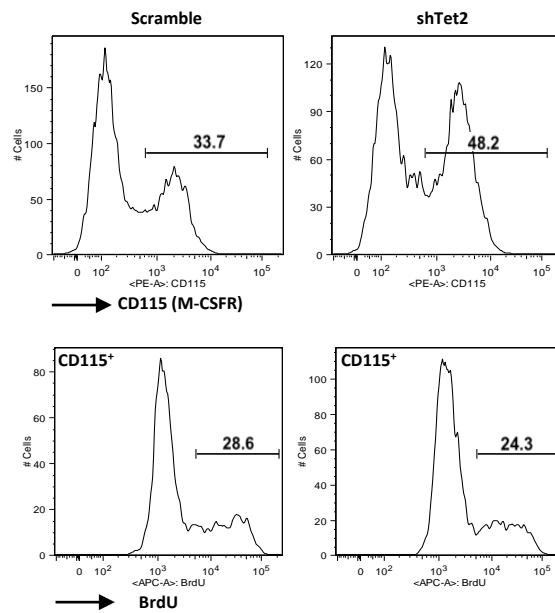

Supplement: NIHMS247005-supplement-3.pdf [file NIHMS247005-supplement-3.pdf]
